# Supplementary figures and images for: Pegylated liposomal doxorubicin combined with cyclophosphamide and vincristine in pediatric patients with relapsed/refractory solid tumor: a single-arm, open-label, phase I study
Source: PubMed Central journal article supplement — eClinicalMedicine. 2024 Jun 20;73:102701. doi: 10.1016/j.eclinm.2024.102701 (PMC11246015; doi:10.1016/j.eclinm.2024.102701), 2024-06-20

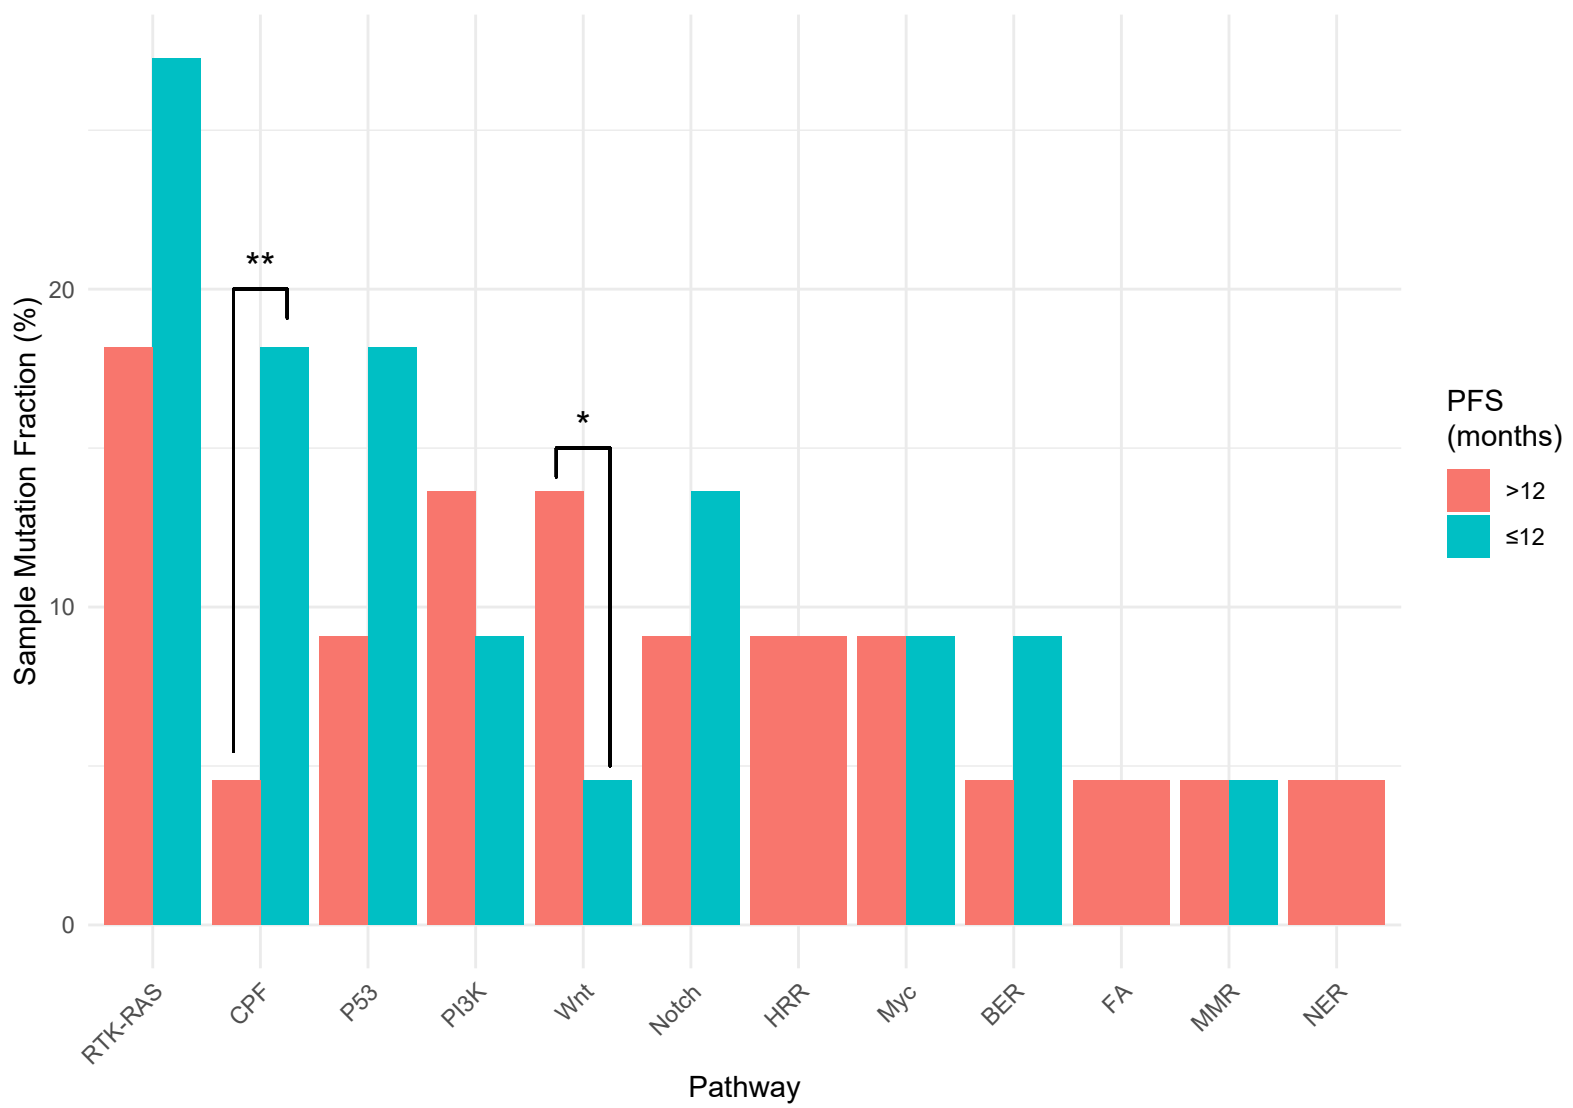

Supplement: mmc2.pdf [file mmc2.pdf]
